# Supplementary material for: Creating an evidence-based economic model for prefilled parenteral medication delivery in the hospital setting
Source: bioRxiv or medRxiv preprint supplement (doi:10.1101/2022.11.04.22281902), 2022-11-10
Supplement: Supplementary file [file media-1.pdf]

## Supplementary Material

Supplemental Information Table 1: Economic Model Input Case Study Values and References for Sensitivity Analysis

| Model Input                                                                                           | Case Study Values |           | Case Study 2 Values |           |
|-------------------------------------------------------------------------------------------------------|-------------------|-----------|---------------------|-----------|
|                                                                                                       | Ampoules          | PFS       | Vials               | PFS       |
| Country                                                                                               | UK                |           | France              |           |
| Drug type*                                                                                            | Atropine          |           | Ephedrine           |           |
| Dose                                                                                                  | 1mg/10mL          |           | 25mg/10mL           |           |
| Doses administered per day*                                                                           | 30                |           | 30                  |           |
| Cost per dose <sup>8</sup>                                                                            | £0.83             | £5.07     | €5.92               | €10.37    |
| pADE rate per 100 administrations <sup>15</sup>                                                       | 1.39              | 0.73      | 1.39                | 0.73      |
| Incremental hospital cost per pADE <sup>5</sup>                                                       | £791.61           | £791.61   | €970                | €970      |
| Percent wastage <sup>7,10</sup>                                                                       | 85%               | 0%        | 74%                 | 0%        |
| Preparation time per dose (seconds) <sup>6</sup>                                                      | 40.3              | 16.9      | 40.3                | 16.9      |
| Supplies per unit injection, n (unit cost) (NHS Tariffs) <sup>18, 19, †</sup>                         |                   |           |                     |           |
| Gloves                                                                                                | 2 (£0.07)         | 2 (£0.07) | 2 (€0.06)           | 2 (€0.06) |
| Needles                                                                                               | 2 (£0.03)         | 1 (£0.03) | 2 (€0.02)           | 1 (€0.02) |
| Syringe                                                                                               | 1 (£0.16)         | 0 (£0.16) | 1 (€0.13)           | 0 (€0.13) |
| Alcohol                                                                                               | 2 (£0.02)         | 1 (£0.02) | 2 (€0.02)           | 1 (€0.02) |
| *Selection of drug type and doses administered per day based on subject matter expert recommendation. |                   |           |                     |           |
| †NHS tariffs converted to euros (€) with purchasing power parity                                      |                   |           |                     |           |
