# Supplementary material for: Creating an evidence-based economic model for prefilled parenteral medication delivery in the hospital setting
Source: bioRxiv or medRxiv preprint supplement (doi:10.1101/2022.11.04.22281902), 2022-11-10
Supplement: Supplementary file [file media-2.pdf]

## Supplementary Material

Supplemental Information Table 2. Economic Model Output: Sensitivity Analysis Case Study Results

| Model Output                                                                                                                                        | Case Study 1 |          |                        | Case Study 2 |          |                        |
|-----------------------------------------------------------------------------------------------------------------------------------------------------|--------------|----------|------------------------|--------------|----------|------------------------|
|                                                                                                                                                     | Ampoules     | PFS      | Incremental Difference | Vials        | PFS      | Incremental Difference |
| <b>pADEs (per year)</b>                                                                                                                             |              |          |                        |              |          |                        |
| Number                                                                                                                                              | 152          | 80       | 72                     | 152          | 80       | 72                     |
| Cost                                                                                                                                                | £120,423     | £63,704  | £56,719                | €147,561     | €78,060  | €69,501                |
| <b>Unused Drug (per year)</b>                                                                                                                       |              |          |                        |              |          |                        |
| Doses                                                                                                                                               | 62,050       | —        | 62,050                 | 31,165       | —        | 31,165                 |
| Cost                                                                                                                                                | £51,502      | —        | £51,502                | €184,499     | —        | €184,499               |
| <b>Drug Cost of Administered Doses (per year)</b>                                                                                                   |              |          |                        |              |          |                        |
| Cost                                                                                                                                                | £9,089       | £55,517  | -£46,428               | €64,824      | €113,552 | -€48,728               |
| <b>Supplies per Unit Injection (per year)</b>                                                                                                       |              |          |                        |              |          |                        |
| Cost                                                                                                                                                | £4,332       | £2,045   | £2,286                 | €3,614       | €1,752   | €1,862                 |
| <b>Preparation Time (hours per year)</b>                                                                                                            |              |          |                        |              |          |                        |
| Hours                                                                                                                                               | 817          | 51       | 766                    | 471          | 51       | 420                    |
| <b>Overall Cost</b>                                                                                                                                 |              |          |                        |              |          |                        |
| <b>TOTAL</b>                                                                                                                                        | £185,345     | £121,266 | <b>£64,079</b>         | €400,498     | €193,363 | <b>€207,134</b>        |
| *Disclaimer: Values are not rounded in any capacity but shown as full numbers without decimals, for this reason value may be off by up to one unit. |              |          |                        |              |          |                        |
