# Supplementary material for: Creating an evidence-based economic model for prefilled parenteral medication delivery in the hospital setting
Source: bioRxiv or medRxiv preprint supplement (doi:10.1101/2022.11.04.22281902), 2022-11-10

## Supplementary Material

Supplemental Information Figure 3. Graphical Depiction of Sensitivity Case Study 2 Results

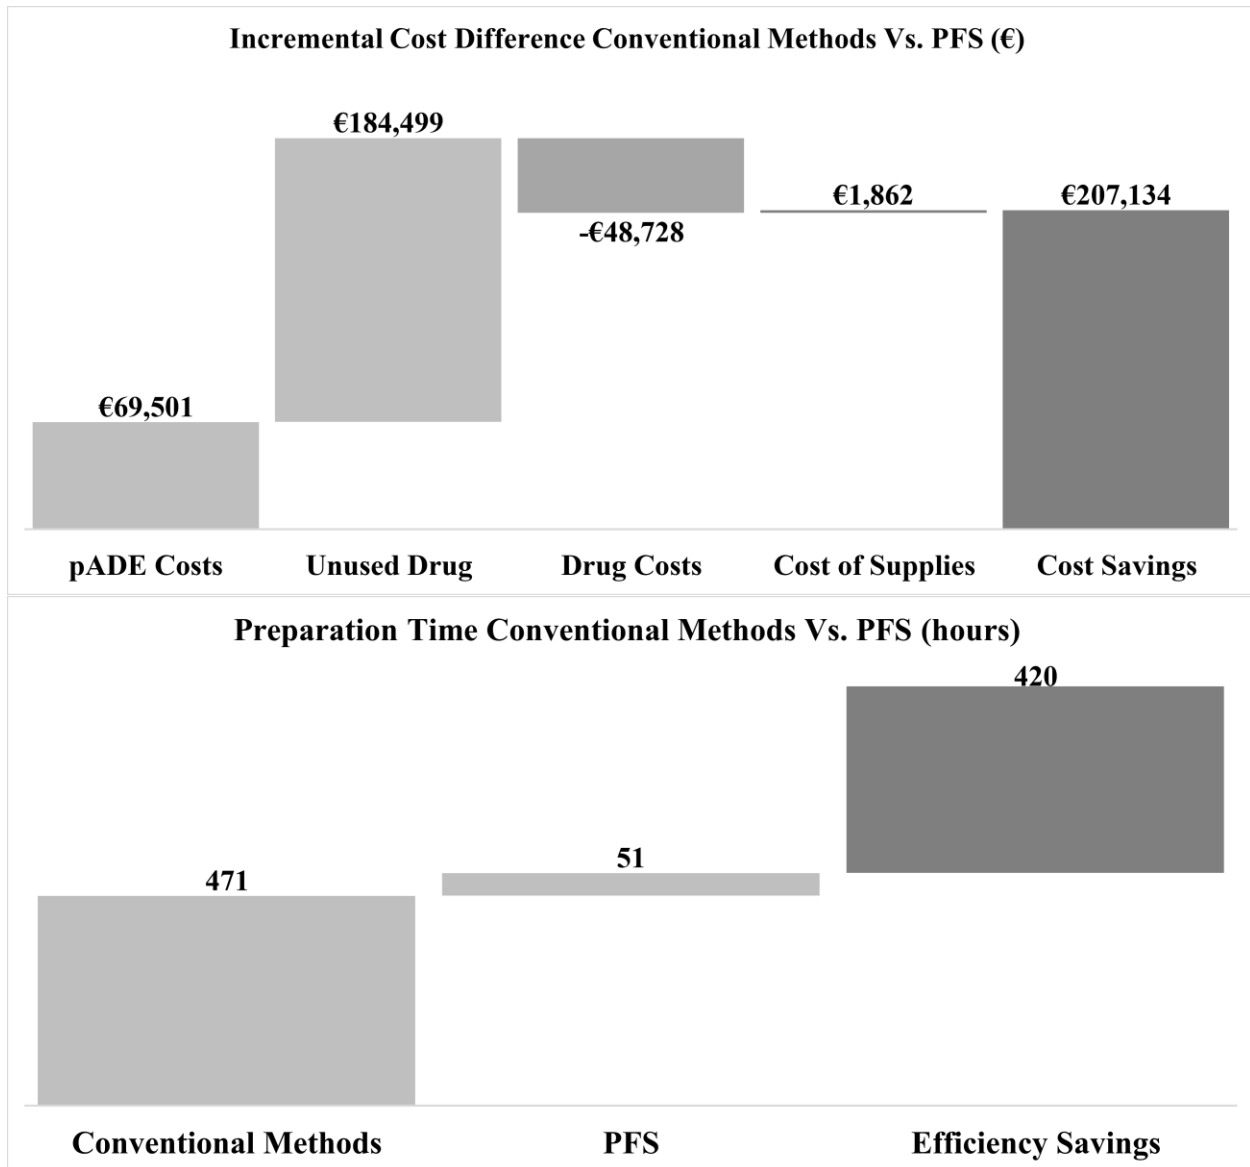

Supplement: Supplementary file [file media-5.pdf]
